## Visual pigments, oil droplets, lens, and cornea characterization in the whooping crane (*Grus americana*)

Megan L. Porter<sup>1</sup>, Alexandra C.N. Kingston<sup>2</sup>, Robert McCready<sup>2</sup>, Evan G. Cameron<sup>2</sup>, Christopher M. Hofmann<sup>2</sup>, Lauren Suarez<sup>2</sup>, Glenn H. Olsen<sup>3</sup>, Thomas W. Cronin<sup>2</sup>, Phyllis R. Robinson<sup>2</sup>

<sup>1</sup>Department of Biology, University of South Dakota, Vermillion, South Dakota 57069 USA

<sup>2</sup>Department of Biological Sciences, University of Maryland Baltimore County, 1000 Hilltop Circle, Baltimore, Maryland 21250 USA

<sup>3</sup>USGS Pautuxent Wildlife Research Center, Laurel, Maryland 20708 USA

*Corresponding Author:*

Megan L. Porter  
Department of Biology  
University of South Dakota  
Vermillion, SD 57069  
Megan.Porter@usd.edu  
605-677-6176

*Keywords:* whooping crane, visual pigment, opsin, ocular media, oil droplets

*Running title:* Whooping Crane visual system

## 1 Abstract

2 Vision has been investigated in many species of birds, but few studies have considered the visual  
3 systems of large birds and the particular implications of large eyes and long-life spans on visual  
4 system capabilities. To address these issues we investigated the visual system of the whooping  
5 crane, *Grus americana* (Gruiformes: Gruidae). *G. americana* (an endangered species) is one of  
6 only two North American crane species and represents a large, long-lived bird where ultraviolet  
7 sensitivity may be degraded by chromatic aberrations and entrance of ultraviolet light into the  
8 eye could be detrimental to retinal tissues. To investigate the whooping crane visual system we  
9 used microspectrophotometry to determine the absorbance spectra of retinal oil droplets and to  
10 investigate if the ocular media (i.e., the lens and cornea) absorbs UV light. *In vitro* expression  
11 and reconstitution was used to determine the absorbance spectra of rod and cone visual pigments.  
12 The rod visual pigments had wavelengths of peak absorbance ( $\lambda_{\max}$ ) at 500 nm, while the cone  
13 visual pigments  $\lambda_{\max}$  values were determined to be 404 nm (SWS1), 450 nm (SWS2), 499 nm  
14 (RH2), and 561 nm (LWS), similar to other characterized bird visual pigment absorbance values.  
15 The oil droplet cutoff wavelength ( $\lambda_{\text{cut}}$ ) values similarly fell within ranges recorded from other  
16 avian species: 576 nm (R-type), 522 nm (Y-type), 506 nm (P-type), and 448 nm (C-type). We  
17 confirm that *G. americana* has a violet-sensitive visual system, although based on the  $\lambda_{\max}$  of the  
18 SWS1 visual pigment (404 nm) may also have some ability for UV sensitivity.

19

## 20 Introduction

21 The assortment of photoreceptors in bird retinas is highly conserved across species. Most  
22 species of birds that have been investigated have retinas with four spectral classes of single  
23 cones, a set of double cones comprised of a principal and an accessory cell, and a rod  
24 photoreceptor class (Bowmaker, 1977; Bowmaker et al., 1997; Hart 2004; Hart et al. 2000; Hunt  
25 et al., 2009; Wright and Bowmaker, 2000). Moreover, avian cone photoreceptors contain oil  
26 droplets within the distal region of the inner segment. These oil droplets are colored due to the  
27 presence of carotenoid pigments, ranging in color from clear through pale green to yellow and  
28 red. These oil droplets act as long-pass filters, tuning the sensitivity of the underlying visual  
29 pigments to longer wavelengths, narrowing the sensitivity function of the underlying  
30 photoreceptor, and reducing overlap with adjacent photoreceptor spectral types (Bowmaker,  
31 1977; Bowmaker et al., 1997; Hart 2004; Hart et al. 2000; Hunt et al., 2009).

32 Typically there are five different classes of oil droplets found in bird retinas, each of  
33 which is paired with a particular cone photoreceptor and visual pigment type (Table 1;  
34 Bowmaker et al. 1997, Hart et al. 2000; Hart & Hunt 2007; Hart 2001b; Hunt et al. 2009). While  
35 visual pigments are characterized by their wavelength of maximal absorbance ( $\lambda_{\max}$ ), oil droplets  
36 are classified by their cutoff wavelength ( $\lambda_{\text{cut}}$ ) values, which describe the wavelength below  
37 which no significant light is transmitted (Lipetz, 1984). Avian rod photoreceptors, containing  
38 rhodopsin 1 (Rh1) visual pigments, do not have oil droplets. Long-wavelength sensitive (LWS)  
39 visual pigments are either found in single or double cones. LWS single cone oil droplets appear  
40 orange to red in color ('R-type'). In double cones, the principal photoreceptor contains an oil  
41 droplet that appears colorless, pale green, or yellow ('P-type'; Partridge 1989; Hart 2001a), while  
42 the accessory photoreceptor only occasionally contains a small droplet (Hunt et al., 2009). Cones  
43 with rhodopsin 2 (Rh2; cones expressing Rh2 opsin genes are designated as middle-wavelength  
44 sensitive or MWS) visual pigments contain yellow, 'Y-type', oil droplets. Cones with short-  
45 wavelength sensitive type 2 (SWS2) cone visual pigments have clear to pale green, 'C-type', oil  
46 droplets that contain carotenoids absorbing strongly below 450nm (Goldsmith et al., 1984; Hart,  
47 2001a; Hart, 2001b; Partridge, 1989). Finally, short-wavelength sensitive type 1 (SWS1) visual  
48 pigments are expressed in cone photoreceptors that contain transparent, 'T-type', oil droplets that  
49 lack carotenoid pigments and have negligible absorbance across the ultraviolet and visible  
50 spectrum.

51 Many studies have investigated the components of avian visual systems, particularly the  
52 spectral characteristics of the visual pigments and oil droplets within the passerines (Hart, 2001b;  
53 Hart and Hunt, 2007; Hunt et al., 2009). Based on the type of SWS1 visual pigment expressed,  
54 avian visual systems can be classified as either violet sensitive (VS;  $\lambda_{\max} = 402\text{-}426$  nm) or  
55 ultraviolet sensitive (UVS;  $\lambda_{\max} = 355\text{-}380$  nm). To understand the potential functional  
56 differences of these two broad visual categories, characterization of additional visual system  
57 components are needed. Most significant are the transmission characteristics of the lens and  
58 cornea, which can effectively absorb UV light and define the limits of photoreceptor UV  
59 sensitivity. In relation to ultraviolet vision, Hart (2001b) hypothesized that smaller birds are  
60 more likely to have UVS pigments, possibly either to improve locomotive flight ability or  
61 because of the characteristics of unpigmented ocular media allowing for the transmission of  
62 enough UV light to be useful for vision only in small eyes. Supporting this hypothesis, Lind et al.  
63 (2014) found a strong correlation between eye axial length (a proxy for body size) and ocular  
64 media transmission of 24 species of bird, supporting the hypothesis that eye size constrains avian  
65 sensitivity to UV light.

66 Of particular interest are the effects of UV light on visual system capabilities. UV light  
67 tends to be more strongly scattered than visible light, reducing contrast. It also is refracted more  
68 strongly than visible light by the cornea and lens, and the resulting longitudinal chromatic  
69 aberration could further reduce spatial resolution and contrast (Bennett and Cuthill, 1994).  
70 Furthermore, UV wavelengths of light can be damaging to retinal tissues, with accumulating  
71 effects that have the potential to be severe for long-lived species (Sliney, 2002; Zuclich, 1989).  
72 However, many larger, long-lived birds have UV-sensitive visual systems, including UV  
73 transmissive ocular media (Carvalho et al., 2011). The question of how large, long-lived birds  
74 balance the ecological demands leading to the evolution of UVS with the potential for UV-  
75 induced retinal damage remains largely unanswered.

76 In this study, we characterize the visual system of the whooping crane, *Grus americana*  
77 (Linnaeus, 1758). This study represents the first visual system characterization for a species  
78 from within the Gruiformes that includes measuring visual pigment and oil droplet absorbance,  
79 as well as examining the lens and cornea for UV absorbance properties. Whooping cranes are  
80 large birds that can live up to 40 years in captivity (Wasser & Sherman, 2010). Birds with larger  
81 eyes, such as *G. americana*, are predicted to use a violet-sensitive SWS1 visual pigment to

82 improve image quality by decreasing defocus due to longitudinal chromatic aberration (Hart and  
83 Hunt, 2007). Additionally, ocular media that absorbs a large percentage of UV light would  
84 reduce the retinal damage due to ultraviolet light over the long life span of this species. As a  
85 further protection against retinal damage, corneal and lens materials are predicted to absorb UV  
86 light in large, long-lived birds. As large, long-lived birds that have distinct visual behaviors  
87 (Cronin et al., 2007) and are subject to intensive conservation efforts, characterizing crane vision  
88 contributes to understanding the ecology of this species for management purposes and more  
89 broadly provides insight to the ecological and evolutionary forces shaping avian visual systems.

## 91 **Results**

### 92 *Opsin retinal expression and visual pigment absorbance*

93 Five full-length opsin transcript sequences were isolated from whooping crane retinal RNA.  
94 Based on phylogenetic analysis, these transcripts are related to other avian opsin sequences and  
95 correspond to the five major vertebrate visual pigment classes: RH1 (1056 bp), RH2 (1068 bp),  
96 SWS1 (1044 bp), SWS2 (1029 bp), and LWS (1095 bp) (Fig. 1). Using *in vitro* expression  
97 studies, these five opsins form visual pigments that fall within the known variation for bird rod  
98 and cone photoreceptors (Fig. 1, Table 1). The four cone visual pigments had peak absorption  
99 ( $\lambda_{\max}$ ) values of 404 nm (SWS1), 450 nm (SWS2), 499 nm (RH2), and 561 nm (LWS) (Fig. 1).  
100 The rod visual pigment had a measured  $\lambda_{\max}$  of 500 nm (RH1). Based on the  $\lambda_{\max}$  of the *G.*  
101 *americana* SWS1 visual pigment (404 nm), the whooping crane visual system can be classified  
102 as violet-sensitive (VS). Similar to other birds, violet sensitivity in the whooping crane SWS1  
103 visual pigment corresponds with the presence of amino acid residues Cys86 and Ser90.

### 104 *Oil droplet, lens and cornea absorptances*

105 We measured the spectral absorbance of 36 oil droplets from a single whooping crane retina.  
106 Based on color, as well as the shape and calculated  $\lambda_{\text{cut}}$  of the measured absorbance curves, five  
107 types of oil droplets were characterized in the *G. americana* retina with  $\lambda_{\text{cut}}$  values of 576 nm (R-  
108 type), 522 nm (putative Y-type), 506 nm (putative P-type), 448 nm (C-type), and negligible  
109 absorbance across all wavelengths (T-type), (Table 2, Fig. 2). The calculated  $\lambda_{\text{cut}}$  values for  
110 each oil droplet type either fell within values reported for other avian species (R-type, C-type, T-  
111 type), or were slightly red-shifted relative to previously reported values (P- and Y-type) (Tables

113 1, 2). The absorptances of the whooping crane cornea and partial lens tissue were both low (Fig.  
114 3). Relevant to the question of *G. americana* UV sensitivity, both tissues had similar rises in  
115 absorptance in the ultraviolet range starting at ~420nm.

## 117 **Discussion**

### 118 *Visual pigments*

119 Five classes of opsin sequences were isolated from whooping crane retina. The expression of  
120 these opsin transcripts demonstrates that whooping cranes have a typical bird visual system,  
121 containing four visual pigments used in cone photoreceptor classes, and one visual pigment  
122 expressed in rod photoreceptors. The measured  $\lambda_{\max}$  from heterologous expression of all of the  
123 crane visual pigments fall within known avian absorbance peak variation for each spectral class.  
124 Of particular interest is the  $\lambda_{\max}$  of the SWS1 visual pigment, where a 404-nm peak absorbance  
125 gives the whooping crane a violet-sensitive visual system.

126 Site 90 is the main amino acid controlling VS/UVS in the SWS1 visual pigments of birds  
127 (Wilkie et al. 2000; Yokoyama et al. 2000). Based on ancestral state reconstructions of the three  
128 amino acid sites (86, 90, and 93) important to tuning SWS1 visual pigments to be either UVS or  
129 VS, avian color vision has shifted between VS and UVS at least 14 times (Ödeen and Håstad  
130 2013). Additionally, violet sensitivity has been hypothesized to be the ancestral state for bird  
131 SWS1 visual pigments (Hunt et al. 2009), though this hypothesis is tenuous as only one of the  
132 three sites can be reconstructed unequivocally (Ödeen and Håstad 2013). A second site, residue  
133 86, has also been shown to play a role in shifts between VS and UVS visual pigments more  
134 broadly in vertebrates. In previous studies of bird SWS1 visual pigment spectral sensitivities,  
135 site-directed mutagenesis demonstrated that both Ser86Cys and Ser90Cys mutations generate a  
136 UV shift in  $\lambda_{\max}$  (Shi and Yokoyama, 2003; Wilkie et al., 2000). Based on sequence data alone,  
137 the SWS1 gene from two species from within the Gruiformes – the crowned crane *Balearica*  
138 *pavonina* (Gruidae) and the common coot *Fulica atra* (Rallidae) – are both predicted to have a  
139  $\lambda_{\max}$  value of 406 nm based on the an amino acid replacement in only one of these sites, the  
140 Cys86 residue (Ödeen and Håstad, 2003). This study represents the first spectral  
141 characterization of any crane visual pigments to test these predictions. The whooping crane  
142 SWS1 gene sequence contains the same Ser90 / Cys86 amino acid residues as characterized in

143 other Gruiformes, and the 404 nm  $\lambda_{\max}$  matches the predicted values for the crowned crane and  
144 common coot extremely well (Ödeen and Håstad, 2003).

145  
146 *Oil droplets*

147 Avian visual systems generally contain five types of oil droplets associated with specific  
148 photoreceptor types. We characterized five types of oil droplets from whooping crane data.  
149 Three of these types can be clearly classified as the T-type, C-type, and R-type droplets (Table  
150 2). Of these, the C-type and R-type oil droplets exhibit typical avian absorptance curves. When  
151 compared to data from other birds, however, the T-type droplet appears to have a relatively high  
152 absorptance ( $\sim 0.2$ ), particularly below 400nm (Fig. 2). It is possible the T-type high absorptance  
153 is a measurement artifact of using an MSP beam (2 $\mu$ m) that is slightly larger than the diameter of  
154 the droplets being measured. If this high absorptance is real, however, it may indicate there are  
155 low levels of carotenoid in the T-type droplet that provide more of a filtering effect than found in  
156 other bird visual systems.

157 The remaining two types represent the Y-type and P-type droplets, which can have very  
158 similar  $\lambda_{\text{cut}}$  values. Because we were unable to use fluorescence to help unambiguously classify  
159 these oil droplet types during spectral characterization (Hart, 2001a), the Y- and P-type  $\lambda_{\text{cut}}$   
160 values are putative. Based on  $\lambda_{\text{cut}}$  ranges from other avian species and on the function of oil  
161 droplets as long-pass filters, we putatively assigned the droplets with  $\lambda_{\text{cut}}$  values of 522 nm as Y-  
162 type, and the droplets with 506 nm  $\lambda_{\text{cut}}$  values as P-type droplets (Table 2, Fig. 4).

163 The gruiform species that have been studied previously have unique Y-type and P-type  
164 oil droplet properties. In general, gruiforms have more intensely pigmented (i.e., more orange)  
165 Y-type droplets than those found in most other birds (Hart, 2001a). Although the spectral  
166 transmittance characteristics of single cone oil droplets tend to vary little across the retina, in the  
167 dusky moorhen *Gallinula tenebrosa* (Gruiformes, Rallidae) the P-type droplets varied in color  
168 across the retina, from almost as orange as the Y-type oil droplets to a pale yellow (Hart, 2001a).  
169 The whooping crane has P-type and Y-type oil droplets that have similar absorbance  
170 characteristics based on our putatively assigned  $\lambda_{\text{cut}}$  values. Additionally, the most abundant oil  
171 droplet type across an avian retina is the P-type, on average representing 29.0-55.5% of the  
172 photoreceptors (Hart, 2001a). Within the dusky moorhen (*Gallinula tenebrosa*; Gruiformes)  
173 retinal oil droplet composition includes 20.2% Y-Type and 33.0% P-Type (Hart 2001). Based



174 on the absorbance similarities of our Y- and P-type droplet classes (Table 2), P-type  $\lambda_{\text{cut}}$   
175 variations across the retina, as well as retinal oil droplet composition differences, it is also  
176 possible that our putatively assigned droplet types either represent P-type droplets from different  
177 retinal regions, or represent mixtures of Y-type and P-type droplets. Because of the limitations  
178 of working with an endangered species, particularly with acquiring fresh retinal tissues, our  
179 sampling of oil droplet types in the whooping crane was limited. If material becomes available,  
180 future studies should characterize the yellow and pale oil droplet more thoroughly, and look for  
181 variations in  $\lambda_{\text{cut}}$  values in different retinal regions.

182

### 183 *Cornea & Lens*

184 Because the T-type oil droplet class has negligible absorption, the sensitivity of the SWS1  
185 photoreceptor is determined by the  $\lambda_{\text{max}}$  of the visual pigment and the absorbance of the ocular  
186 media (Hart, 2001b). This is similar to the findings of Lind et al. (2014), who modeled the visual  
187 system of 38 bird species based on visual pigment  $\lambda_{\text{max}}$  and ocular media transmittance. This  
188 study found that color discrimination in bright light is mostly dependent on the visual pigment  
189 (UVS or VS), regardless of ocular media characteristics, hypothesizing that ocular media spectral  
190 tuning is mainly relevant for detecting weak UV signals. At the low end of VS bird vision,  
191 SWS1 sensitivity overlaps with the upper part of the UV range (e.g. 380 nm), as is the case with  
192 the 404 nm SWS1 whooping crane visual pigment. Consequently, a limited UV sensitivity may  
193 be possible despite cornea and lens properties, given whooping cranes are mostly white birds that  
194 are active during the day when reflectance would be maximized in the UV portion of the  
195 spectrum.

196 Birds with VS visual systems tend to have ocular media with longer-wavelength  
197 transmission (measured as  $\lambda_{\text{T}0.5}$ , the wavelength at half the measured transmission maximum)  
198 values, ranging from 335-378 nm, while those with UVS have values ranging from 316-343 nm  
199 (Hart and Hunt, 2007). Much of the ocular media absorbance properties come from the lens,  
200 with the cornea contributing little to overall ocular media UV absorbance, therefore our corneal  
201 absorbance data are not surprising. The absorbance measured from the whooping crane lens is  
202 more surprising, particularly in the UV part of the spectrum (Fig. 3). Because our measurements  
203 were made on pieces of dissected lens tissue, we have not fully characterized the intact lens UV  
204 absorbance characteristics and we predict that intact whooping crane lenses are most likely much



205 more UV absorbant. The drop in absorbance below ~375nm may be due to leaching of some of  
206 the lens pigments from lens pieces, or due to some uncharacterized fluorescence corrupting  
207 scans. Additionally, many birds have multifocal lenses (Lind and Kröger, 2008), and although  
208 the focal properties within Gruiformes species are unknown, our measurements may have missed  
209 lens areas important to UV absorbance. Despite these potential artifacts, the rise in absorbance  
210 in the blue portion of the lens spectrum suggests that the whooping crane intact lens most likely  
211 has a  $\lambda_{T0.5}$  value somewhere in the 380-410nm range, consistent with other birds with VS visual  
212 systems.

213         Similar to the whooping crane, the visual systems of several other large birds have been  
214 characterized as VS, including the turkey (*Meleagris gallopavo*, Hart et al. 1999), peafowl (*Pavo*  
215 *cristatus*, Hart 2002), and ostrich (*Struthio camelus*, Wright and Bowmaker, 2001). Other larger  
216 bird species with violet-sensitive visual systems have expected  $\lambda_{T0.5}$  values in the longer-  
217 wavelength ranges of UV light, between 358 and 370 nm (Hart et al. 1999; Hart 2002; Wright  
218 and Bowmaker, 2001). Interestingly, of those species with SWS1 visual pigment  $\lambda_{max}$  values that  
219 are similar to those we found in the whooping crane, there is a large variation in ocular media  
220 transmission (Ostrich: SWS1  $\lambda_{max}$  = 405 nm, ocular media  $\lambda_{T0.5}$  = 377 nm; wedge-tailed  
221 shearwater: SWS1  $\lambda_{max}$  = 406 nm, ocular media  $\lambda_{T0.5}$  = 335 nm) (Hart and Hunt, 2007). One  
222 possibility for this variation is related to eye size; the wedge-tailed shearwater eye is smaller than  
223 the ostrich, reducing chromatic aberration and thus permitting an ocular media with a shorter  
224  $\lambda_{T0.5}$ . However, the variation in ocular media transmission in relatively large eyes also  
225 demonstrates that long optical paths do not necessarily absorb the UV portion of the spectrum.  
226 This suggests that there may be some fine-scale tuning of visual system UV sensitivity in the  
227 absorbance properties of the ocular media based on the visual ecology of the species. Despite  
228 not having fully characterized lens UV absorbance properties, the possibility exists of limited  
229 UV vision, particularly in bright light environments, in the whooping crane based on a SWS1  
230 visual pigment shifted towards UV wavelengths. This suggests there may be a role for  
231 functional UV sensitivity in whooping crane visual ecology.

232

### 233 *Visual System Implications for Grus americana*

234 Retinal damage due to long-term UV exposure is a potential issue for long-lived birds like the  
235 whooping crane. Therefore, to avoid retinal damage, long-lived birds might be expected to have

236 UV-absorbing ocular media, making UV-sensitive photoreceptors superfluous (Carvalho et al.,  
237 2011). Additionally, studies of other avian visual systems found a strong correlation between  
238 eye size and the ocular media transmittance, with larger eyes having longer  $\lambda_{T0.5}$ , the wavelength  
239 at half the measured transmission maximum (Lind et al., 2014). The whooping crane visual  
240 system in part matches these predictions by having a violet sensitive SWS1 visual pigment.

241 Within birds with VS visual pigments there is variation in ocular media transmittance  
242 (Lind et al. 2014). If whooping crane lenses have low UV absorbance, mechanisms to repair UV  
243 light damage would be needed, as with other long-lived birds having UV sensitive visual systems  
244 (e.g. Psittaciformes) (Carvalho et al., 2011). It is also possible that the extremely violet-sensitive  
245 SWS1 visual pigment is a compromise between the longitudinal chromatic aberration that would  
246 result from transmission of short-wavelength UV light (necessary to excite UVS pigments) and  
247 the need to detect UV signals, perhaps in plumage. Nearly all white feathers reflect significant  
248 amounts of UV (Eaton and Lanyon, 2003; Mullen and Pohland, 2008), and the ability to detect  
249 some UV light may contribute to the overall brightness of the reflected light from the white *G.*  
250 *americana* feathers. The violet sensitive *G. americana* visual system, with a SWS1 absorbance  
251 peak at 404 nm, would be capable of detecting signals in the UV range.

252

### 253 *Summary*

254 In this study we measured the spectral characteristics of the *Grus americana* visual pigments, oil  
255 droplets, cornea, and partial lens tissue. The whooping crane contains a typical set of avian  
256 visual pigments and oil droplets, and as predicted a violet-sensitive visual system. Further work  
257 characterizing the distribution of oil droplets, as well as the potential for variation in oil droplet  
258 absorbance, across the retina would further contribute to the overall understanding of whooping  
259 crane visual systems. Measurements of intact corneal absorbance indicate this tissue does not  
260 contribute to UV light filtering in the whooping crane eye, while our measurements of lens  
261 pieces suggests the presence of some near-UV absorbance in the lens as a whole. The presence  
262 of a short SWS1 visual pigment in a diurnal animal suggests that whooping cranes have a visual  
263 system capable of detecting UV light, warranting future studies of whooping crane plumage  
264 reflectance. The difference in ocular media absorbance characteristics among species with VS  
265 visual systems suggests that rather than tuning either visual pigments or oil droplets, some birds  
266 may fine-tune UV sensitivity with ocular media absorbance.

267

268 **Materials and Methods**269 *Tissue acquisition and storage*

270 Tissues were collected from a single captive individual of the whooping crane, *Grus americana*,  
271 from a breeding colony established at the USGS Patuxent Wildlife Research Center, MD, USA.  
272 The animal was euthanized due to circumstances unrelated to this study, and eye and muscle  
273 tissues were collected immediately after euthanization. Because the whooping crane is an  
274 endangered species and tissue from additional individuals was not available, retinal tissue from  
275 one eye was used to determine the spectral characteristics of the oil droplets, cornea, and lens,  
276 while the other was used for molecular techniques to isolate and characterize the opsin genes.  
277 Collected tissues were dissected from the bird and either placed on ice until use (for spectral  
278 measurements), or immersed in either ethanol (muscle tissue) or RNAlater (retinal tissue;  
279 Qiagen, Valencia, CA, USA) and stored at -80°C for use in DNA or RNA extractions for  
280 molecular studies.

281

282 *Characterization of opsins expressed in the retina and phylogeny reconstruction*

283 Retinal tissue was dissected out of a single, fresh crane eye and used in standard RNA extraction  
284 protocols (TRIzol, Life Technologies, Carlsbad, CA, USA). Retinal total RNA was used for first  
285 strand synthesis with an oligo(dT) primer and Superscript III reverse transcriptase (Life  
286 Technologies, Carlsbad, CA, USA). The resulting cDNA was used for 3' RACE procedures  
287 with degenerate primers based on alignments of published bird and squamate opsin sequences  
288 for each class of vertebrate visual pigments (RH1, RH2, LWS, SWS1, SWS2; Table 3). Positive  
289 double stranded RT-PCR products were cloned using the pGEM-T Easy vector system  
290 (Promega, Madison, WI, USA), and individual clones screened via sequencing with vector  
291 primers. Once a piece of each gene was isolated, if the 5' end of the transcript was missing 5'  
292 RACE was performed using 3' gene specific primers using the 5'/3' RACE kit, 2<sup>nd</sup> generation  
293 (Roche, Madison, WI, USA). Full-length transcripts were confirmed by sequencing with a  
294 proofreading reverse transcriptase (AccuScript Hi-Fi Reverse Transcriptase, Agilent  
295 Technologies, Santa Clara, CA, USA) and polymerase (PrimeSTAR HS DNA polymerase,  
296 Takara, Japan) using gene specific primers designed to the 5' and 3' ends of each transcript  
297 (Table 3). All PCR products were sequenced by Genewiz, Inc. (Germantown, MD, USA). Full

298 length opsin transcript sequences have been deposited to the NCBI Genbank database (**accession**  
 299 **numbers provided upon acceptance**).

300 To place the characterized opsin sequences in an evolutionary context, whooping crane  
 301 transcripts were aligned with publicly available opsin sequences from birds including *Corvus*  
 302 *macrorhyncos* (**RH1**: BAJ05379), *Serinus canaria* (**RH1**: CAB91997; **RH2**: CAB91995;  
 303 **SWS1**: CAB91993; **SWS2**: CAB91994; **LWS**: CAB91996), *Taeniopygia guttata* (**RH1**:  
 304 AAF63461; **RH2**: NP\_001070164; **SWS1**: AAF63463; **SWS2**: NP\_001070165; **LWS**:  
 305 NP\_001070170), *Columba livia* (**RH1**: AAD32241; **RH2**: AAD32242; **SWS1**: AAD38034;  
 306 **SWS2**: AAD38035; **LWS**: AAD38036), *Gallus gallus* (**RH1**: P22328; **RH2**: P28683; **SWS1**:  
 307 P28684; **SWS2**: NP\_990848; **LWS**: NP\_990771), *Melopsittacus undulatus* (**RH1**: AAC41247;  
 308 **RH2**: AAC41246; **SWS1**: CAA72483), *Anas platyrhynchos* (**RH1**: AAC41245; **RH2**:  
 309 EOA96196), *Ptilonorhynchus violaceus* (**SWS2**: AFK82745; **LWS**: AFK82727), *Chlamydera*  
 310 *nuchalis* (**SWS2**: AFK82748; **LWS**: AFK82730), *Chlamydera maculata* (**SWS2**: AFK82747;  
 311 **LWS**: AFK82729), *Ailuroedus crassirostris* (**SWS2**: AFK82743; **LWS**: AFK82725),  
 312 *Scenopoeetes dentirostris* (**SWS2**: AFK82744; **LWS**: AFK82726), *Calyptorhynchus latirostris*  
 313 (**SWS1**: ADG96042), *Cacatua galerita* (**SWS1**: ADG96044), *Eolophus roseicapillus* (**SWS1**:  
 314 ADG96043), *Barnardius semitorquatus* (**SWS1**: ADG96041), *Platycercus elegans* (**SWS1**:  
 315 ADG96036), *Cyanistes caeruleus* (**SWS1**: AAP30082), *Palacrocorax carbo* (**SWS1**:  
 316 ABS86975), *Spheniscus humboldti* (**SWS1**: CAC20913), *Sericulus chrysocephalus* (**LWS**:  
 317 AFK82728). Amino acid sequences were aligned using MAFFT (Kato et al., 2005; Kato et  
 318 al., 2002) and the resulting alignment used to estimate phylogenetic relationships and node  
 319 confidence as bootstrap values using RAxML (Stamatakis, 2006; Stamatakis and Hoover, 2008).  
 320 Based on previously published phylogenies of opsin relationships (Porter et al., 2012), the  
 321 phylogeny was rooted using avian (*Gallus gallus*: ACX32474; *Taeniopygia guttata*:  
 322 NP\_001266194), anuran (*Xenopus laevis*: NP\_001165363), and squamate (*Anolis carolinensis*:  
 323 ACX32472) sequences from the clade designated ‘vertebrate ancient (VA) opsins’, which are  
 324 evolutionarily basal to the vertebrate visual pigments (Philp et al. 2000; Porter et al., 2012).

325

### 326 *Visual Pigment Heterologous Expression, Purification and Spectral Analysis*

327 To characterize visual pigment spectral absorbance *in vitro*, each full-length opsin gene was first  
 328 cloned into the mammalian expression vector pMT3 and appended with the last 15 amino acids

329 of bovine rhodopsin (Franke et al., 1988; Oprian et al., 1987). Because we initially had difficulty  
330 characterizing the 5' end of the LWS opsin transcript (~30 bp), a construct consisting of the first  
331 16 bp from the *Columbia livia* LWS opsin followed by the near-full length whooping crane LWS  
332 opsin was created for *in vitro* expression. Based on the known function of the opsin N-terminal  
333 region in proper protein localization but not in spectral tuning, this construct allowed us to  
334 characterize the whooping crane LWS visual pigment absorbance. All constructs were expressed  
335 transiently in HEK 293A cells using Turbofect transfection reagent (Thermo Scientific,  
336 Waltham, MA, USA). Briefly, 10 µg of plasmid DNA was mixed with 20 µl of Turbofect and  
337 incubated in 1.0 mL Dulbecco's Modified Eagle Medium (Life Technologies, Carlsbad, CA,  
338 USA) for 20 minutes and added to an 80% confluent 100 mm x 20 mm plate of HEK 293A cells.  
339 Cells were harvested at 48 h post transfection. Protein expression was confirmed by Western  
340 Blot analysis using anti-1D4 primary antibody and an alkaline phosphatase conjugated secondary  
341 antibody (data not shown). Blots were visualized after incubation with AttoPhos fluorescent  
342 substrate (Promega, Madison, WI, USA) on a Storm 840 molecular imager (GE Healthcare Life  
343 Sciences, Pittsburgh, PA, USA).

344 After confirmation that each construct expressed opsin in the HEK 293A cells at  
345 sufficient levels, proteins were purified for spectral characterization. All purification steps were  
346 performed under dim red light at 4°C. Thirty 100 mm x 20 mm plates of transiently transfected  
347 HEK 293A cells were harvested and washed once in 1x PBS. Before solubilization,  
348 photopigments were reconstituted in 5 mL of 10 mM MES/150 mM NaCl buffer (pH 6.0)  
349 containing 40 µM 11-*cis* retinal for 1 hour. Membranes were solubilized in 10 mM MES/150  
350 mM NaCl buffer (pH 6.0), 1% n-Dodecyl-β-D-maltoside (DM), 0.2 mg/ml PMSF for 2.5 hours  
351 and spun in a clinical centrifuge to pellet debris. Homogeneous protein supernatant was  
352 incubated with anti-1D4 Sepharose column matrix for 16 hours (Wilkie et al. 2000). The  
353 photopigment/column matrix complex was washed 10 times with 10 mM MES/150 mM NaCl  
354 buffer (pH 6.0), 0.1% DM to remove excess chromophore. Photopigment was eluted from  
355 column matrix in 0.1% DM, 80 µM 1D4 peptide. Eluates were concentrated to ~250µL using  
356 Amicon Ultra 30K MWCO centrifugal filters (Millipore, Billerica, MA, USA).  
357 Spectrophotometric measurements were taken from 240 to 700 nm in 1-nm increments with a  
358 Hitachi U3300 UV-Vis Spectrophotometer.

359

### 360 *Microspectrophotometry: Lens, cornea and oil droplet absorbance*

361 Microspectrophotometry was used to measure the spectral absorbance of photoreceptor oil  
362 droplets and to investigate the UV absorbance of intact cornea and partial lens tissue of *G.*  
363 *americana* eyes. All tissues for absorbance measurements were collected from a single eye. For  
364 all measurements (lens, cornea, and oil droplets), a 2  $\mu\text{m}$  beam was placed in the tissue of  
365 interest (oil droplet, lens, or cornea) and absorbance was measured at 1-nm intervals from 350 to  
366 700 nm. For oil droplet measurements, multiple droplets of each class, as determined by color to  
367 the human eye, were measured from a single retina (Table 2). The best oil droplet absorbance  
368 spectra for each color class (n=3 to 9) were converted to absorptance, averaged, and used to  
369 calculate the  $\lambda_{\text{cut}}$  values for each drop type, defined as the wavelength of the intercept at the  
370 value of maximum measured absorptance by a line tangent to the absorptance curve at half-  
371 maximum measured absorptance (Lipetz, 1984). Although the best way to characterize ocular  
372 media transmission is *in situ* measurement of lens, cornea, and vitreous humor spectral properties  
373 (Lind et al. 20014), the opportunistic availability of the whooping crane tissue and limited  
374 sample size (i.e. 1 animal, 2 eyes) made it impossible to prepare the materials required for this  
375 technique before the tissue became unusable. Therefore, we used MSP to investigate the  
376 absorbance properties of the isolated cornea and pieces of the lens tissue, as a measure of  
377 whether or not whooping crane ocular media contained any significant UV absorbance. For these  
378 measurements, the cornea and lens were dissected from a single eye. Corneal measurements  
379 were made on whole cornea tissue, sandwiched in 1X PBS between two UV transmissive  
380 coverslips. For lens measurements, pieces of lens tissue were used in the same setup (i.e. in 1X  
381 PBS held in place between UV transmissive coverslips). For both lens and corneal  
382 measurements, the best absorbance measurements (n= 4 and 7, respectively) were averaged and  
383 converted to absorptance. Typically lens and corneal spectral characteristics are described in  
384 terms of ocular transmission ( $\lambda_{\text{T}0.5}$ , the wavelength at half the measured transmission maximum;  
385 (Emmerton et al., 1980). However, given the methods used to characterize absorbance, and the  
386 low UV absorbance measured in both tissue types, calculating  $\lambda_{\text{T}0.5}$  was not possible.

387

### 388 **Symbols / Abbreviations**

389  $\lambda_{\text{max}}$  - wavelength of peak absorbance

390  $\lambda_{\text{cut}}$  - oil droplet cutoff wavelength



391  $\lambda_{T0.5}$  - the wavelength at half the measured transmission maximum  
392 SWS1 – vertebrate cone short-wavelength sensitive type 1 visual pigments  
393 SWS2 – vertebrate cone short-wavelength sensitive type 2 visual pigments  
394 MWS – cone photoreceptors with middle wavelength-sensitivity  
395 RH2 – vertebrate middle wavelength-sensitive cone visual pigments  
396 RH1 – vertebrate rod visual pigments  
397 LWS - vertebrate cone long-wavelength sensitive type visual pigments  
398 R-type – red-type avian oil droplets  
399 P-type - pale-type avian oil droplets  
400 Y-type - yellow-type avian oil droplets  
401 C-type - clear-type avian oil droplets  
402 T-type - transparent-type avian oil droplets  
403 UV - ultraviolet  
404 UVS – ultraviolet sensitive  
405 VS – violet sensitive

406

#### 407 **Acknowledgements**

408 The authors would like to thank Laura Seidman, Ifeolu Akinnola, and Elelbin Ortiz for  
409 laboratory assistance, P. Mullen for a helpful discussion of UV reflection in the Gruiformes, and  
410 two anonymous reviewers for valuable comments to improve the manuscript.

411

#### 412 **Competing Interests**

413 The authors declare no competing financial interests.

414

#### 415 **Author Contributions**

416 M.L.P. assisted with the supervision of the molecular characterization of the opsin genes and the  
417 spectral characterization of the oil droplets, analyzed the data, and wrote the manuscript.

418 A.C.N.K. and L.S. characterized the opsin sequences, C.H. measured the oil droplet spectra, and  
419 R.M. and E.C. performed heterologous expression experiments. G.H.O. provided access to the  
420 whooping cranes and dissected out the appropriate tissues. P.R.R. and T.W.C. supervised the  
421 project and provided all other laboratory resources.



422

423 **Funding**

424 The research was funded by the Air Force Office of Scientific Research (FA9550-09-1-0149 to

425 T.W.C.).

## REFERENCES

- Bennett, A. and Cuthill, I. C.** (1994). Ultraviolet vision in birds: what is its function? *Vision Research* **34**, 1471-1478.
- Bowmaker, J. K.** (1977). The visual pigments, oil droplets and spectral sensitivity of the pigeon. *Vision Research* **17**, 1129–1138.
- Bowmaker, J. K., Heath, L.A., Wilkie, S. E., and Hunt, D. M.** (1997). Visual pigments and oil droplets from six classes of photoreceptors in the retinas of birds. *Vision Research* **37**, 2183-2194.
- Carvalho, L. S., Knott, B., Berg, M. L., Bennett, A. T. D. and Hunt, D. M.** (2011). Ultraviolet-sensitive vision in long-lived birds. *Proceedings of the Royal Society B: Biological Sciences* **278**, 107–114.
- Cronin, T. W., Kinloch, M. R. and Olsen, G. H.** (2007). Head-bobbing behavior in walking whooping cranes (*Grus americana*) and sandhill cranes (*Grus canadensis*). *J Ornithol* **148**, 563–569.
- Eaton, M. D., and Lanyon, S. M.** (2003). The ubiquity of avian ultraviolet plumage reflectance. *Proceedings of the Royal Society of London B* **270**, 1721-1726.
- Emmerton, J., Schwemer, J., Muth, I. and Schlecht, P.** (1980). Spectral transmission of the ocular media of the pigeon (*Columba livia*). *Investigative Ophthalmology & Visual Science* **19**, 1382-1387.
- Franke, R. R., Sakmar, T. P., Oprian, D. D. and Khorana, H. G.** (1988). A single amino acid substitution in rhodopsin (lysine 248----leucine) prevents activation of transducin. *J Biol Chem* **263**, 2119–2122.
- Goldsmith, T. H., Collins, J. S. and Licht, S.** (1984). The cone oil droplets of avian retinas. *Vision Research* **24**, 1661–1671.
- Hart, N. S.** (2001a). Variations in cone photoreceptor abundance and the visual ecology of birds. *Journal of Comparative Physiology A: Sensory, Neural, and Behavioral Physiology* **187**,

685–697.

- Hart, N. S.** (2001b). The visual ecology of avian photoreceptors. *Prog Retin Eye Res* **20**, 675–703.
- Hart, N. S.** (2004). Microspectrophotometry of visual pigments and oil droplets in a marine bird, the wedge-tailed shearwater *Puffinus pacificus*: topographic variations in photoreceptor spectral characteristics. *The Journal of Experimental Biology* **207**, 1229-1240.
- Hart, N. S. and Hunt, D. M.** (2007). Avian visual pigments: characteristics, spectral tuning, and evolution. *Am Nat* **169 Suppl 1**, S7–26.
- Hart, N. S., Partridge, J. C., Cuthill, I. C. and Bennett, A. T. D.** (2000). Visual pigments, oil droplets, ocular media and cone photoreceptor distribution in two species of passerine bird: the blue tit (*Parus caeruleus* L.) and the blackbird (*Turdus merula* L.). *Journal of Comparative Physiology A* **186**, 375-387.
- Hunt, D. M., Carvalho, L. S., Cowing, J. A. and Davies, W. L.** (2009). Evolution and spectral tuning of visual pigments in birds and mammals. *Philosophical Transactions of the Royal Society B: Biological Sciences* **364**, 2941–2955.
- Katoh, K., Kuma, K., Toh, H. and Miyata, T.** (2005). MAFFT version 5: improvement in accuracy of multiple sequence alignment. *Nucleic Acids Research* **33**, 511-518.
- Katoh, K., Misawa, K., Kuma, K. and Miyata, T.** (2002). MAFFT: a novel method for rapid multiple sequence alignment based on fast Fourier transform. *Nucleic Acids Research* **30**, 3059-3066.
- Lind, O. E., and Kröger, R. H. H.** (2008). Multifocal optical systems and pupil dynamics in birds. *The Journal of Experimental Biology* **211**, 2752-2758.
- Lind, O., Mitkus, M., Olsson, P., and Kelber, A.** (2014). Ultraviolet vision in birds: the importance of transparent eye media. *Proceedings of the Royal Society B* **281**, 20132209.
- Lipetz, L. E.** (1984). A new method for determining peak absorbance of dense pigment samples

and its application to the cone oil droplets of *Emydoidea blandingii*. *Vision Research* **24**, 567–604.

**Mullen, P. and Pohland, G.** (2008). Studies on UV reflection in feathers of some 1000 bird species: are UV peaks in feathers correlated with violet-sensitive and ultraviolet-sensitive cones? *Ibis* 150:59-68.

**Ödeen, A. and Håstad, O.** (2003). Complex distribution of avian color vision systems revealed by sequencing the SWS1 opsin from total DNA. *Molecular Biology and Evolution* **20**, 855–861.

**Ödeen, A. and Håstad, O.** (2013). The phylogenetic distribution of ultraviolet sensitivity in birds. *BMC Evolutionary Biology* **13**, 36

**Oprian, D. D., Molday, R. S. and Kaufman, R. J.** (1987). Expression of a synthetic bovine rhodopsin gene in monkey kidney cells. *Proceedings of the National Academy of Sciences* **84**, 8874-8878.

**Partridge, J. C.** (1989). The visual ecology of avian cone oil droplets. *Journal of Comparative Physiology A* **165**, 415-426.

**Philp, A. R., Garcia-Fernandez, J. M., Soni, B. G., Lucas, R. J., Bellingham, J., and Foster, R. G.** (2000). Vertebrate ancient (VA) opsin and extraretinal photoreception in the Atlantic salmon (*Salmo salar*). *Journal of Experimental Biology* **203**, 1925-1936.

**Porter, M. L., Blasic, J. R., Bok, M. J., Cameron, E. G., Pringle, T., Cronin, T. W., and Robinson, P. R.** (2012). Shedding new light on opsin evolution. *Proceedings of the Royal Society B* **279**, 3–14.

**Shi, Y. and Yokoyama, S.** (2003). Molecular analysis of the evolutionary significance of ultraviolet vision in vertebrates. *Proceedings of the National Academy of Sciences* **100**, 8308-8313.

**Sliney, D. H.** (2002). How light reaches the eye and its components. *International journal of toxicology* **21**, 501-509.

**Stamatakis, A.** (2006). RAxML-VI-HPC: maximum likelihood-based phylogenetic analyses with thousands of taxa and mixed models. *Bioinformatics* **22**, 2688-2690.

**Stamatakis, A. and Hoover, P.** (2008). A rapid bootstrap algorithm for the RAxML Web servers. *Systematic Biology* **57**, 758-771.

**Wilkie, S., Robinson, P. R., Cronin, T. W., Poopalasundaram, S., Bowmaker, J. K., and Hunt, D. M.** (2000). Spectral tuning of avian violet-and ultraviolet-sensitive visual pigments. *Biochemistry* **39**, 7895-7901.

**Wright, M. W., and Bowmaker, J. K.** (2001). Retinal photoreceptors of paleognathous birds: the ostrich (*Struthio camelus*) and rhea (*Rhea americana*). *Vision Research* **41**, 1-12.

**Yokoyama, S., Radlwimmer, F. B., and Blow, N. S.** (2000). Ultraviolet pigments in birds evolved from violet pigments by a single amino acid change. *Proceedings of the National Academy of Sciences* **97**, 7366-7371.

**Zulich, J. A.** (1989). Ultraviolet-induced photochemical damage in ocular tissues. *Health Physics* **56**, 671-682.

**Figure 1. Opsin sequence diversity and corresponding visual pigment absorbance spectra from *Grus americana* retinal tissues.** The maximum likelihood phylogeny of avian opsin sequences is rooted using representative avian, anuran, and squamate using sequences from the clade designated ‘vertebrate ancient (VA) opsins’, which are evolutionarily basal to the vertebrate visual pigments. Numbers above branches are bootstrap proportion nodal support values. The major vertebrate opsin clades have been indicated: rhodopsin 1 (RH1), rhodopsin 2 (RH2), short-wavelength sensitive 1 (SWS1), short-wavelength sensitive 2 (SWS2), and long-wavelength sensitive (LWS). The *G. americana* visual pigment spectra are plotted next to the corresponding opsin group for each sequence. For each opsin sequence, the normalized visual pigment absorbance curve is plotted in grey, and the template fit is in black. The calculated wavelength of maximum absorbance based on template fitting is indicated in the upper right corner of each spectral plot.

**Figure 2. Whooping crane oil droplet absorptance.** A) Baseline corrected absorptance of each class of whooping crane oil droplet. Each droplet is plotted as follows: red = R-type, yellow = Y-type, green = P-type, blue = C-type; grey = T-type. B) Histogram of  $\lambda_{cut}$  values for all measured oil droplets with the exception of the T-type, colored as in panel A. Inset is a photograph taken through the microspectrophotometer showing the colors of whooping crane retinal oil droplets: R = R-type, P/Y = P- and Y-Type droplets, C = C-type, and T = T-type droplets.

**Figure 3. Whooping crane cornea (grey) and lens (black) absorptance.**

**Figure 4. Overlay of visual pigment (solid lines) and oil droplet (dotted lines) absorptance curves, and calculated sensitivity of the four main cone types.** A) SWS1 and SWS2 visual pigments, and C-type oil droplet; B) Rh2 visual pigment and Y-type oil droplet; C) LWS visual pigment with R-type and P-type oil droplets; D) Normalized sensitivity of the four main cone photoreceptors based on visual pigment absorbance and oil droplet transmittance.

**Table 1.** Typical avian oil droplet photoreceptor association and wavelength cutoffs (data from Bowmaker et al. 1997, Hart et al. 2000; Hart & Hunt 2007; Hart 2001b; Hunt et al. 2009).

| Type   | Color       | Wavelength cutoff ( $\lambda_{cut}$ ) | Associated Photoreceptor | Range of peak absorbances ( $\lambda_{max}$ ) |
|--------|-------------|---------------------------------------|--------------------------|-----------------------------------------------|
| ---    | No droplet  | ---                                   | Rh1 rods                 | 500-510 nm                                    |
| P-type | Pale        | 460-498 nm                            | Double cones             | 543-571 nm                                    |
| R-type | Red         | 514-586 nm                            | LWS cones                | 543-575 nm                                    |
| Y-type | Yellow      | 490-516 nm                            | MWS cones                | 497-510 nm                                    |
| C-type | Clear       | 392-449 nm                            | SWS2 cones               | 427-463 nm                                    |
| T-type | Transparent | <350 nm                               | SWS1 cones               | 355-380 nm (UVS)<br>400-426 nm (VS)           |

**Table 2.** Whooping crane visual pigment wavelength of peak absorbance ( $\lambda_{max}$ ) and oil droplet cutoff wavelength ( $\lambda_{cut}$ ) in nm.  $\lambda_{cut}$  values are followed in parentheses by the number of oil droplet scans included in each average. The  $\lambda_{max}$  of the double cones (in grey) is inferred based on expression patterns of the LWS visual pigment in other bird species.

| Photoreceptor        | LWS     | MWS     | SWS1     | SWS2    | Double-Cones | Rods |
|----------------------|---------|---------|----------|---------|--------------|------|
| $\lambda_{max}$ (nm) | 561     | 499     | 404      | 450     | 561          | 500  |
| Oil droplet          | R-type  | Y-type  | T-type   | C-type  | P-type       | ---  |
| $\lambda_{cut}$ (nm) | 576 (9) | 522 (3) | --- (13) | 448 (8) | 506 (3)      | ---  |



**Table 3.** Primer sequences used to characterize whooping crane opsin transcripts.

| <b>Primer</b>                     | <b>Sequence (5'-&gt;3')</b>   |
|-----------------------------------|-------------------------------|
| <i>Degenerate 3' RACE primers</i> |                               |
| WC_RH1/2deg                       | ATGAAYGGGACRGARGGBRTCAATTTT   |
| WC_SWS1_deg                       | ATGTCGCRYGASGARGAGTTYTACCTKTT |
| WC_SWS2_deg                       | ATGCMGARGSCSCGKAG             |
| WC_LWS_deg                        | CGICGICGICAYGAIGAYGARGA       |
| <i>5' RACE primers</i>            |                               |
| WC_LWSR1075                       | CTACGCGGGCGCCACGGAGGAGCT      |
| WC_LWSR601                        | GGCAGAGACGGTGTAGCCCTCGATG     |
| WC_LWSR550                        | CGAGGTCTGGTTGATGACGCTGAT      |
| WC_LWSR445                        | CAGACCACGAACCACCGCTCCCA       |
| WC_LWSR371                        | GGTGTAGCCCTCGATGACGCAGAGC     |
| <i>Gene specific primers</i>      |                               |
| WC_RH1F                           | ATGAACGGGACAGAAGGCCAAGACTT    |
| WC_RH1R                           | TTACAGCCTTGTTCCCAGGGTTCC      |
| WC_RH2F                           | ATGGATATCTGCAGAATTCGGCTTT     |
| WC_RH2R                           | CTACGCAGGAGAGACCTGGCTGGT      |
| WC_LWSR                           | CTACGCGGGCGCCACGGAGGAGCT      |
| WC_SWS1F                          | ATGTCGGGTGACGAGGAGTTTTACC     |
| WC_SWS1R                          | TCAGCTGGGGCTGACCTGGCT         |
| WC_SWS2F                          | ATGCTCCCCGACGACTTCTACATCCCC   |
| WC_SWS2R                          | CTAGACCTGGGTGGCCTGCGAGGAGGC   |

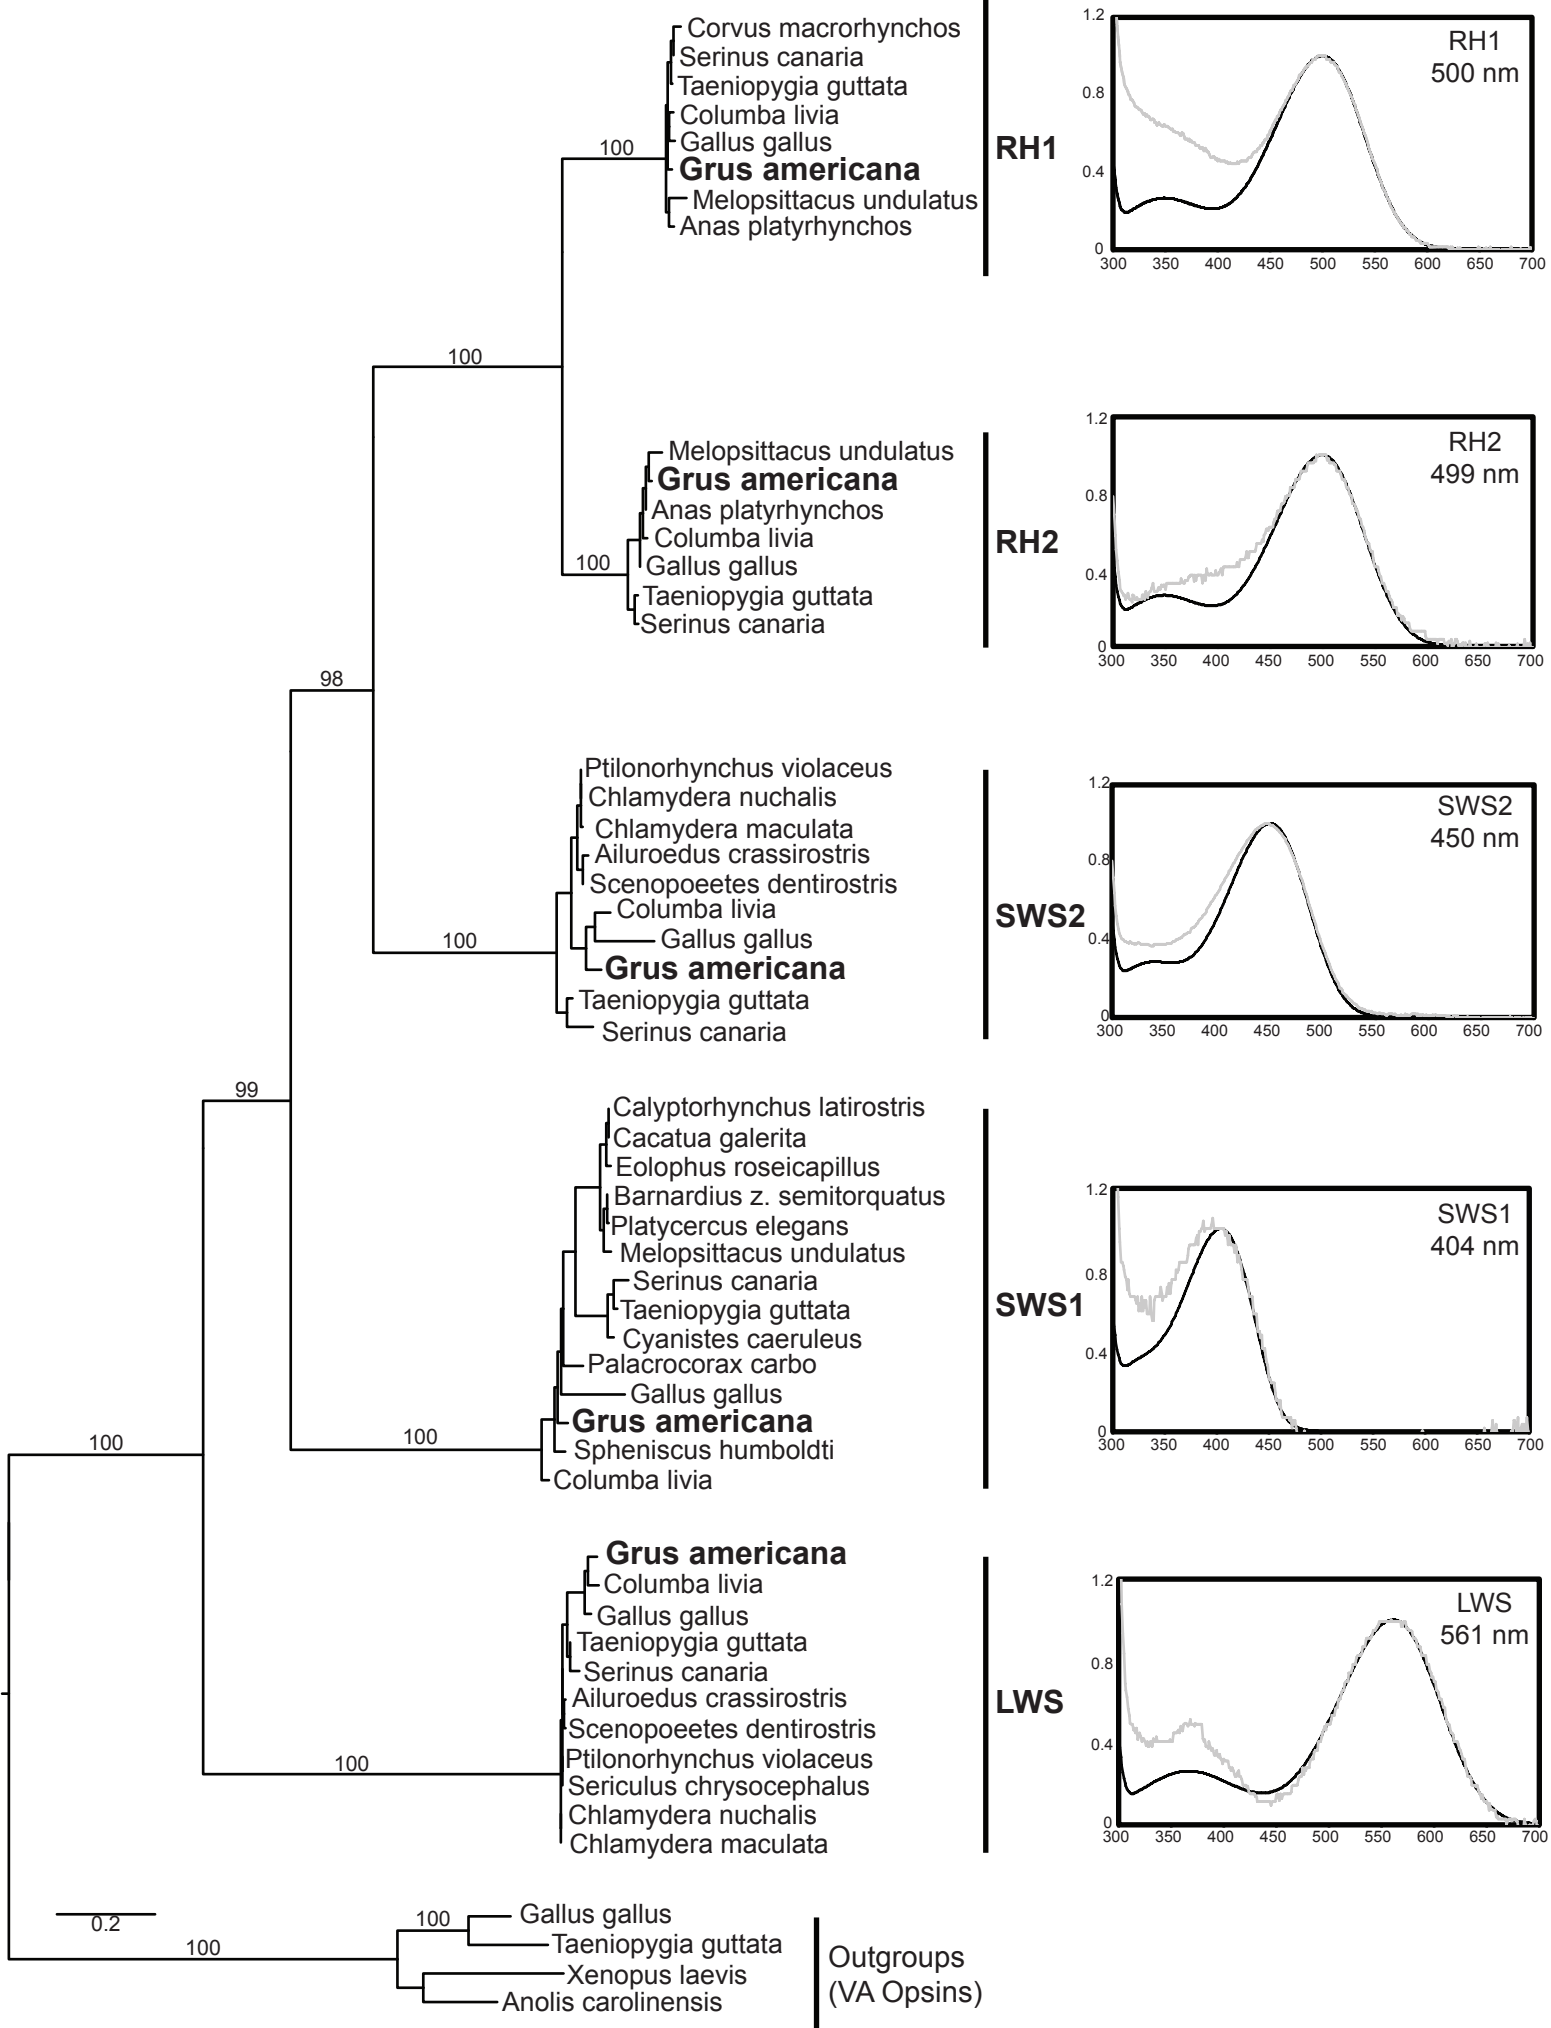

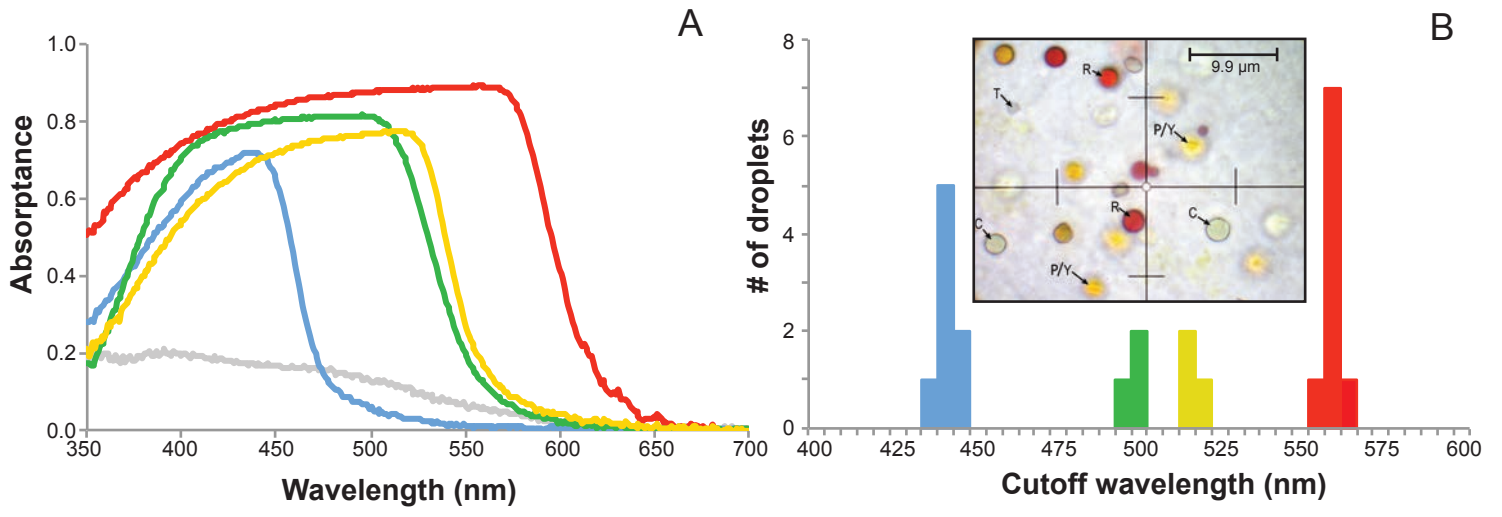

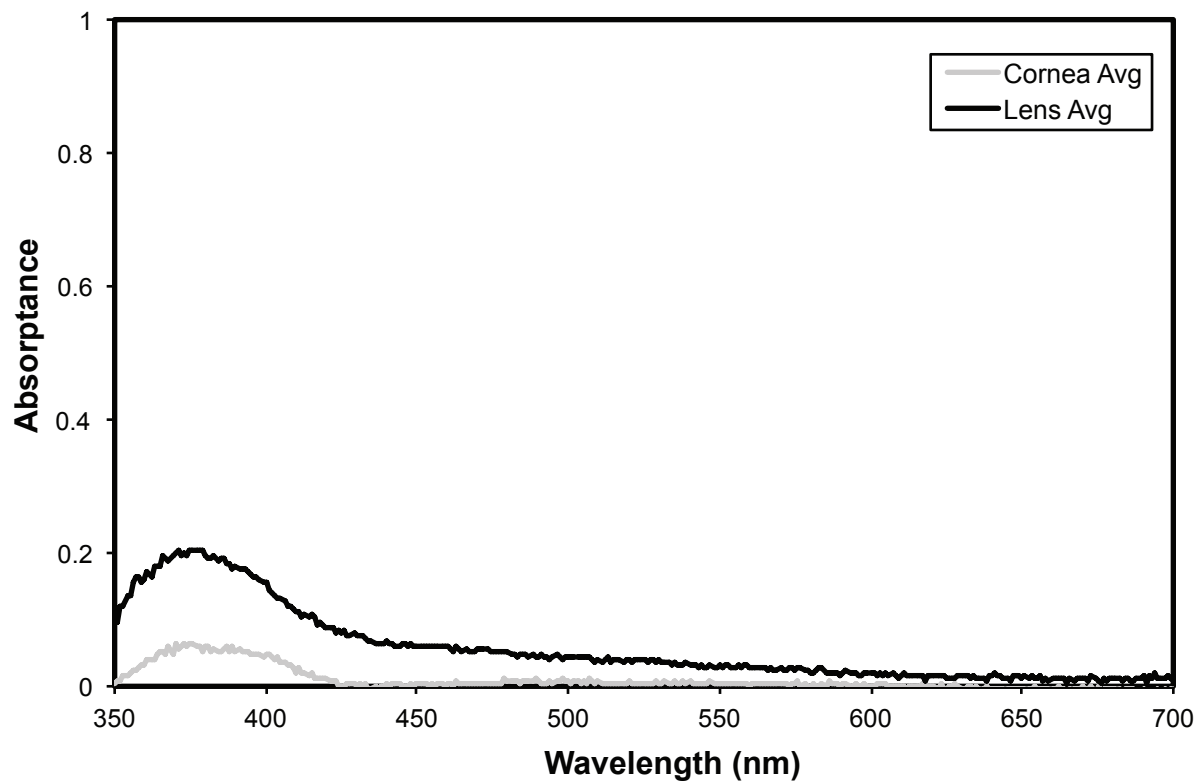

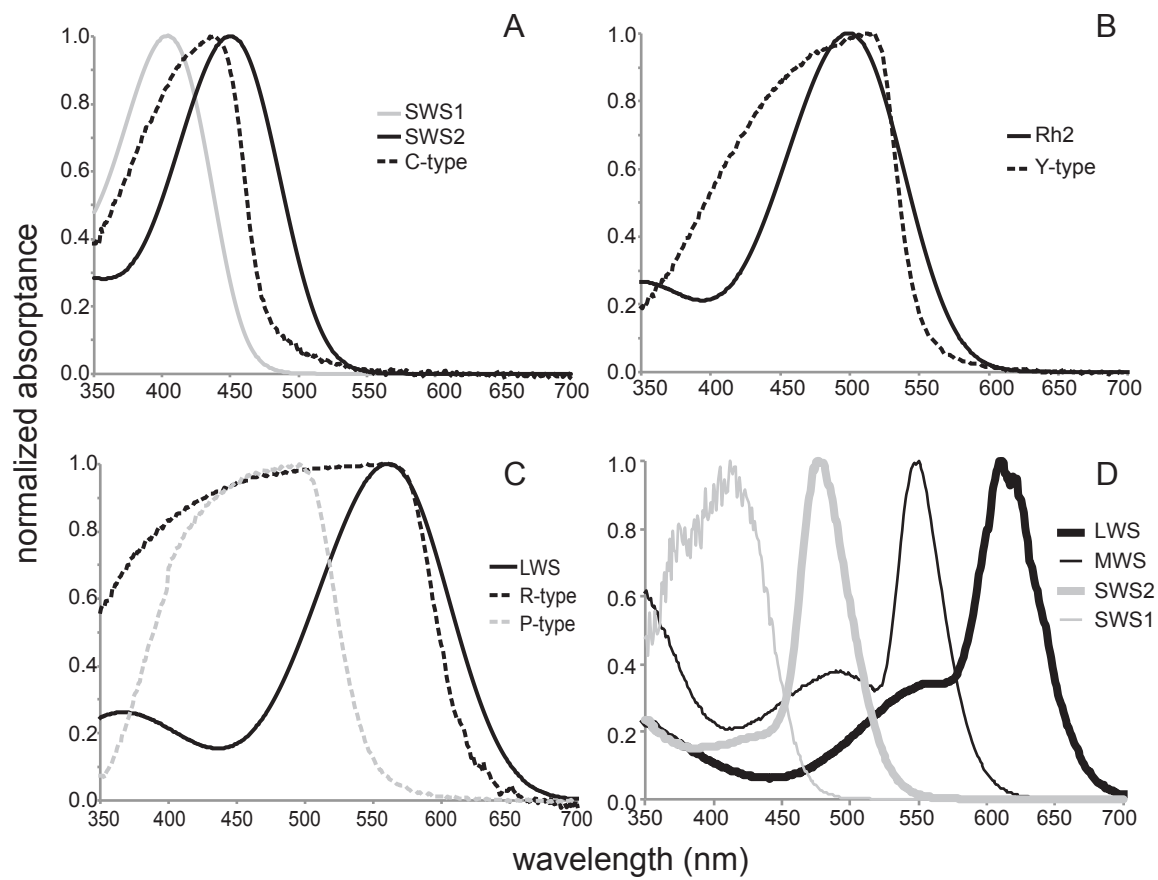

Source: https://cob.silverchair.com/jeb/article-pdf/doi/10.1242/jeb.108456/2038137/jeb_108456.pdf
